# Supplementary material
Source: Elsevier journal article supplement (https://www.sciencedirect.com/science/article/pii/S0300289620302106)
Supplement: mmc1 [file S0300289620302106:mmc1.pdf]

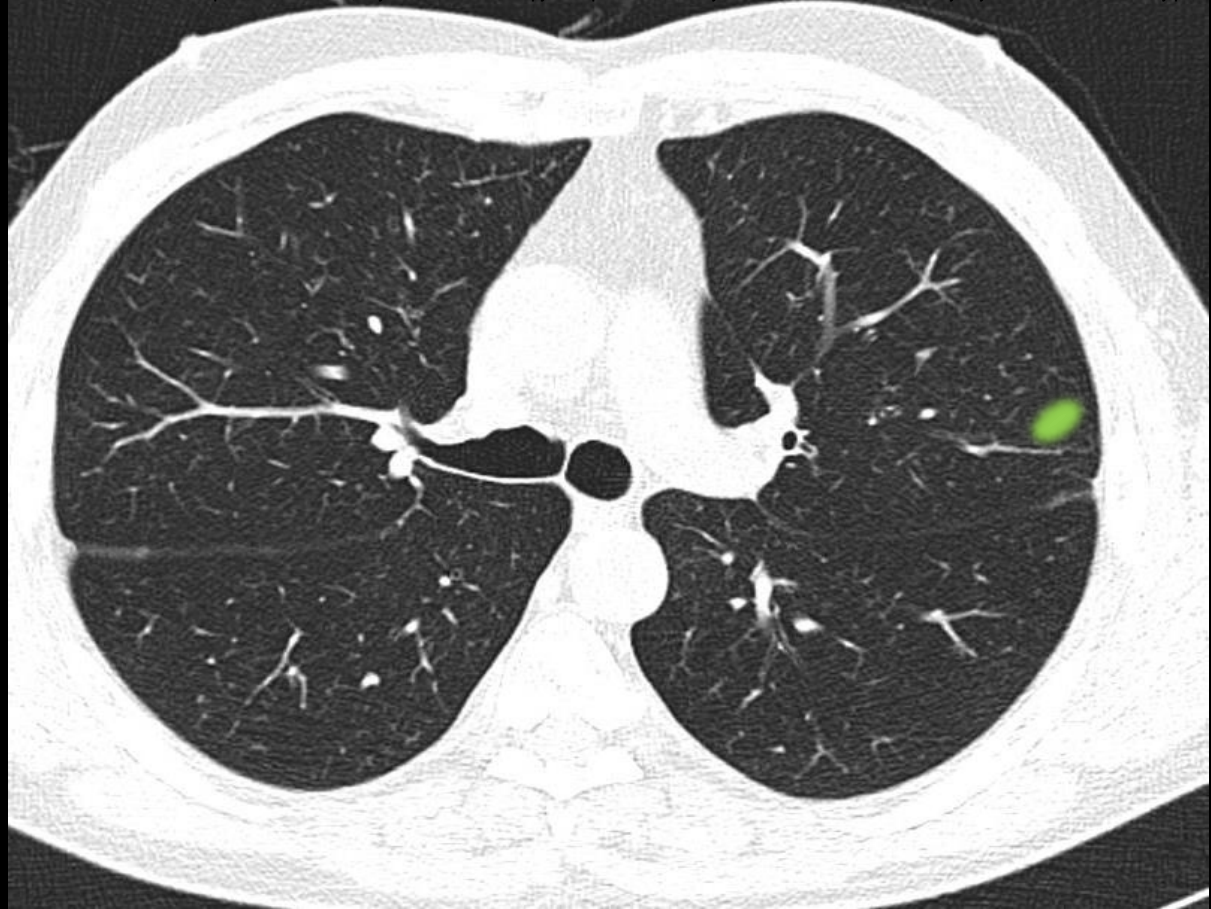

Considera que el nódulo (verde) tiene localización:

- Central
- Periférica

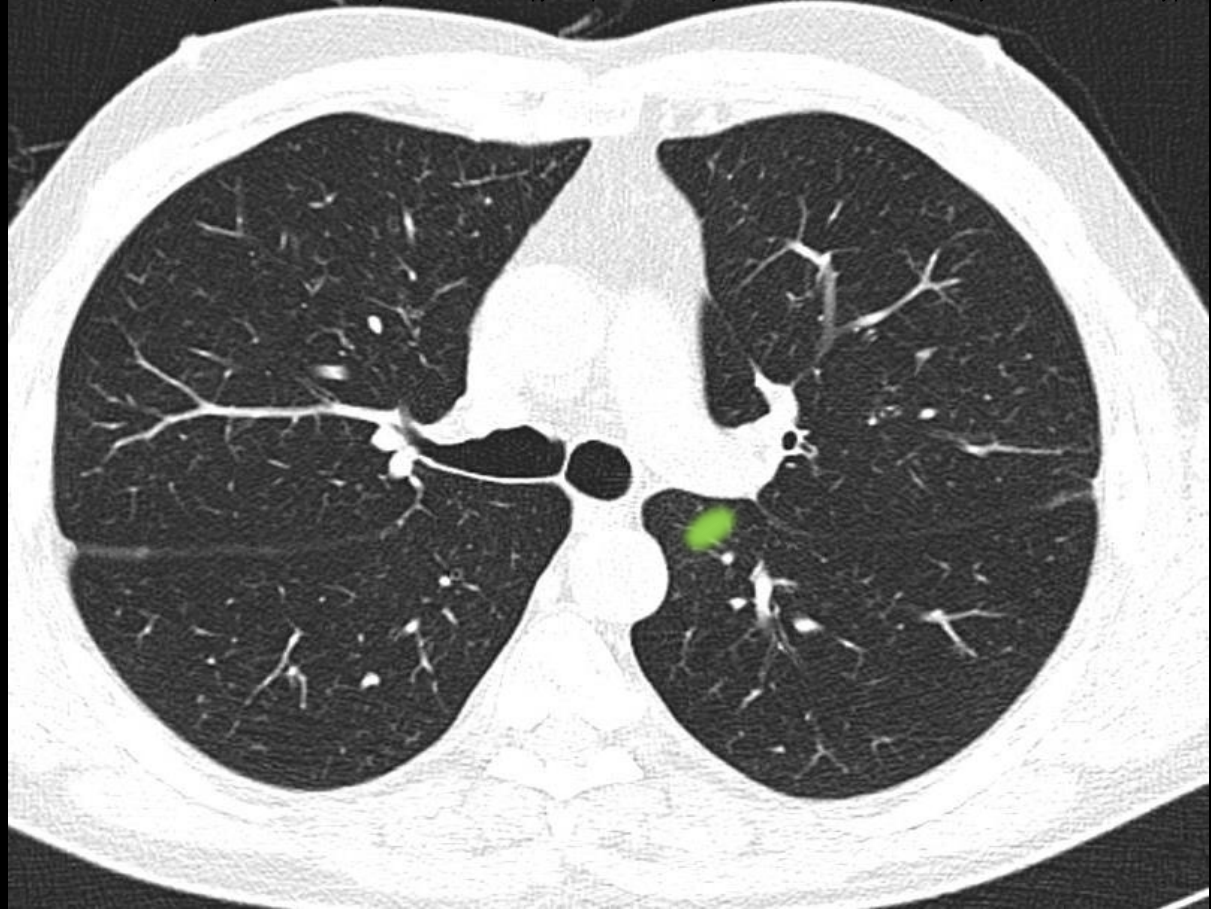

Considera que el nódulo (verde) tiene localización:

- Central
- Periférica

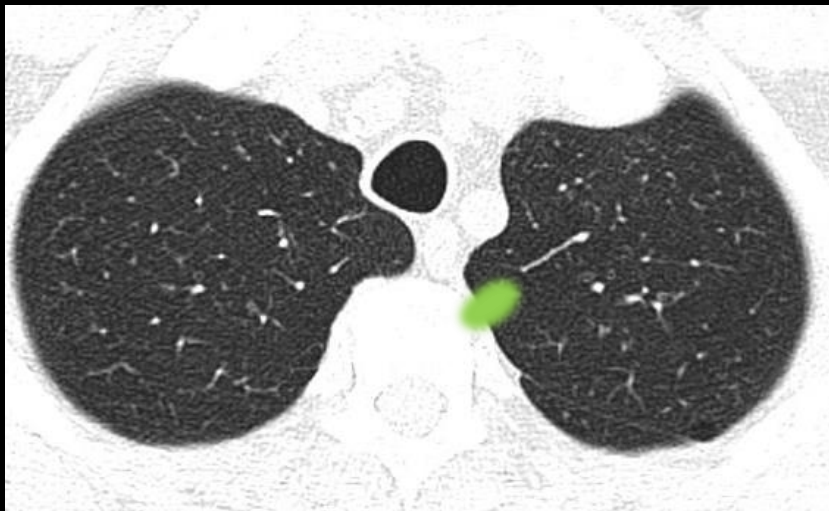

Considera que el nódulo (verde) tiene localización:

- Central
- Periférica

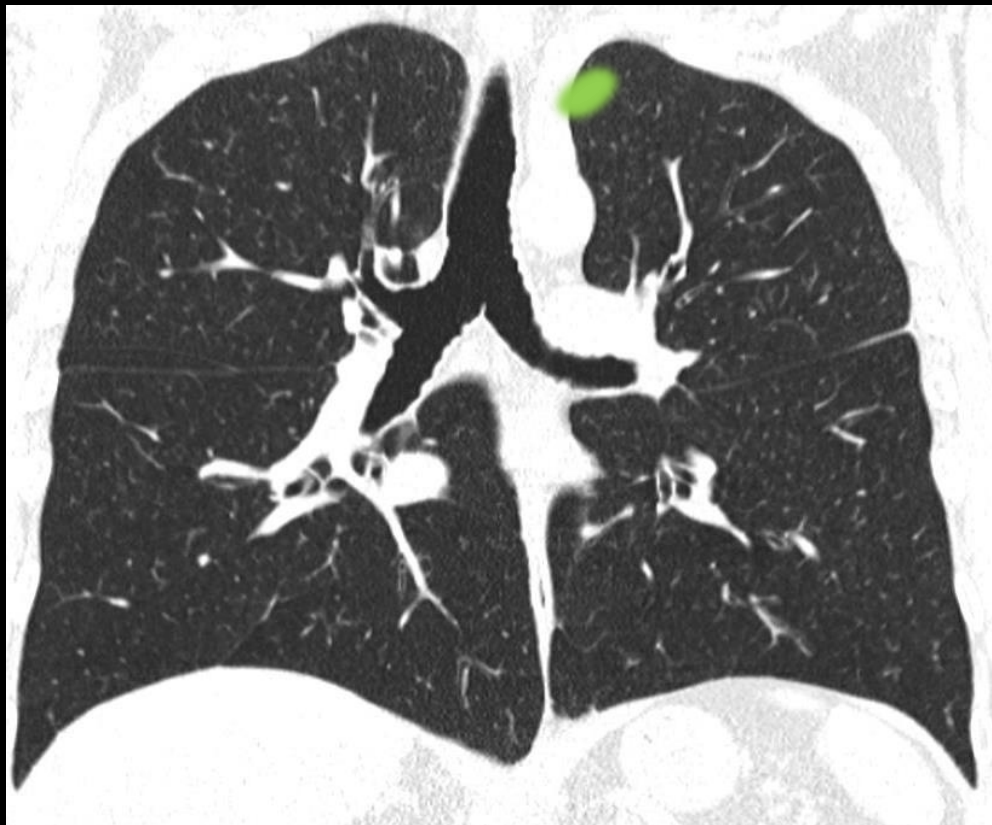

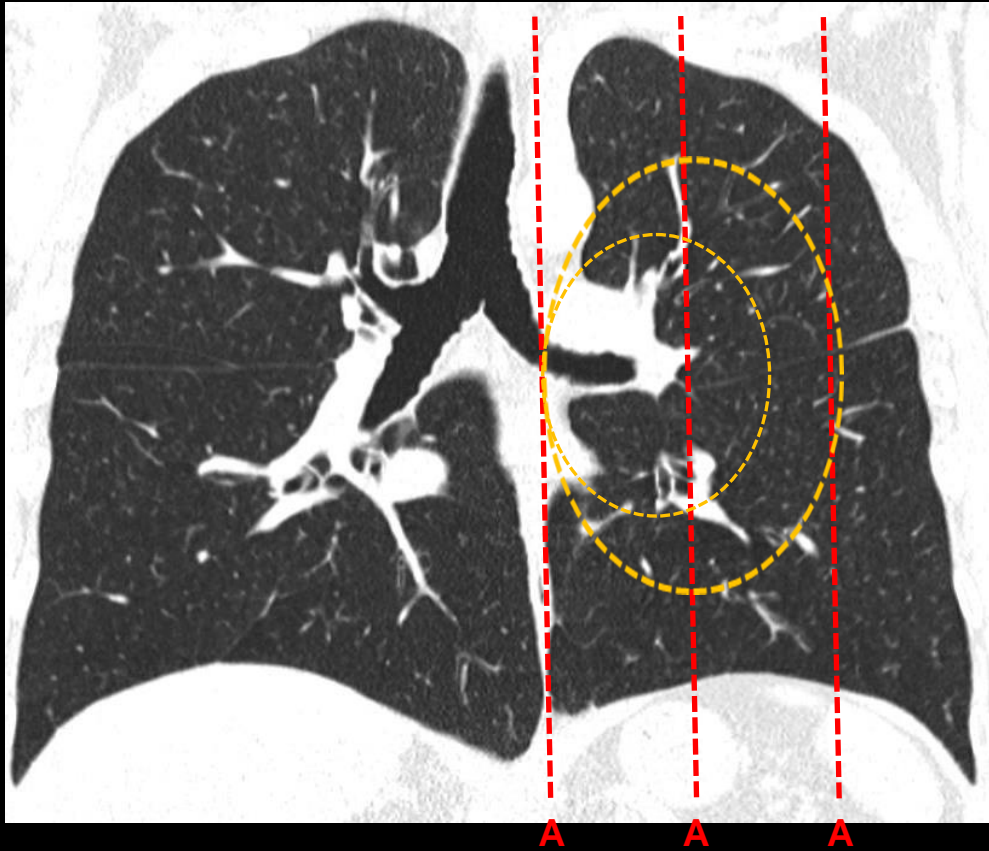

¿Cuál de las siguientes líneas define mejor centralidad?

- Líneas A
- Líneas B

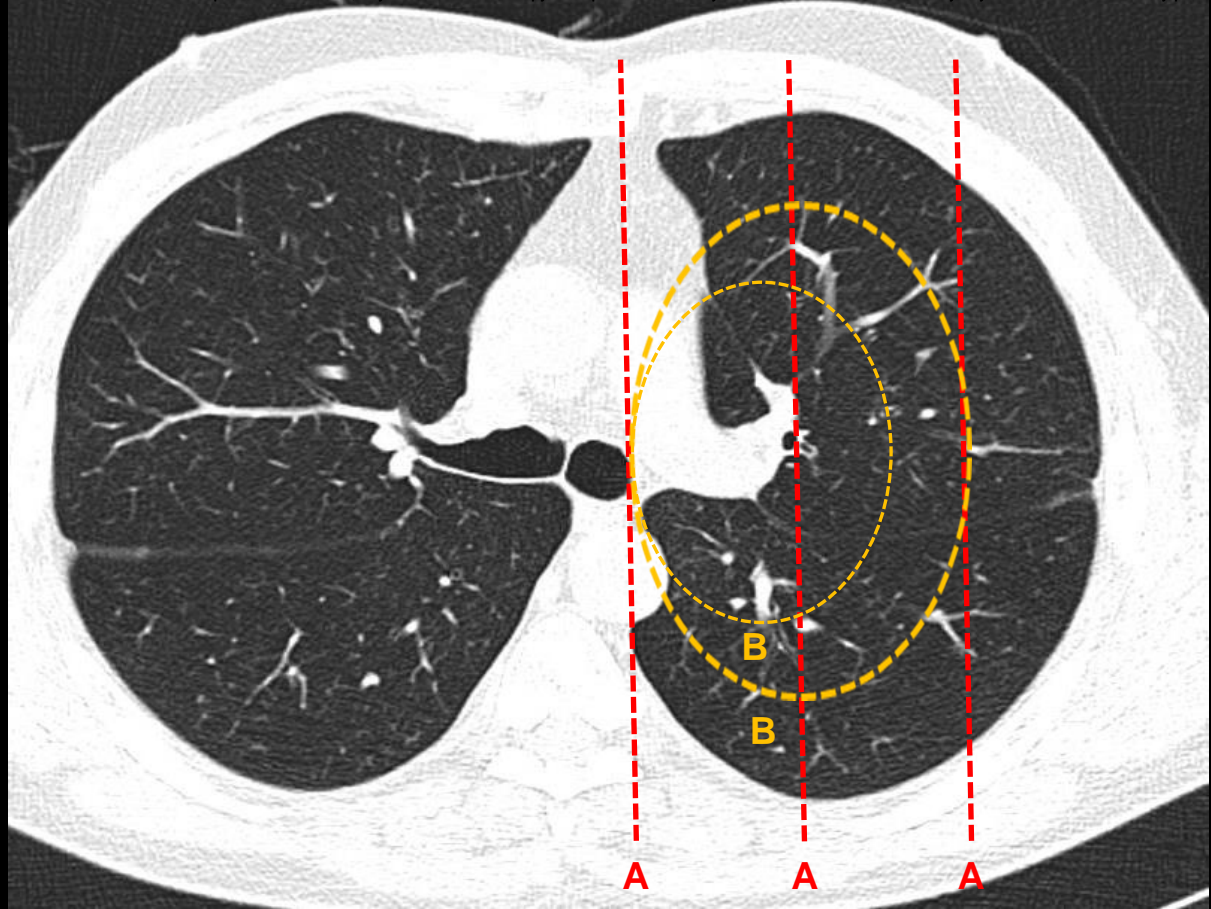

¿Cuál de las siguientes líneas define mejor centralidad?

- Líneas A
- Líneas B

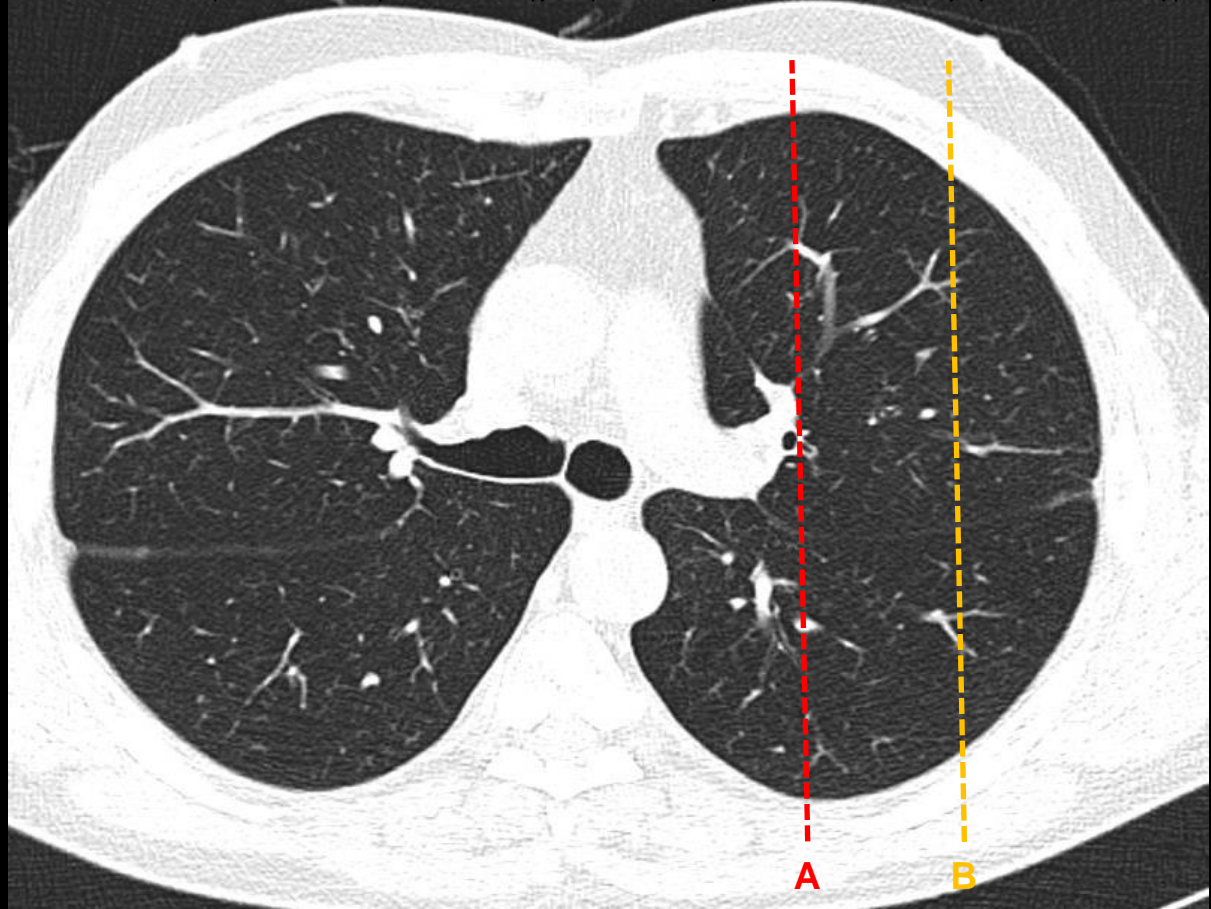

¿Cuál de las dos líneas delimita un tumor central?

- Línea A
- Línea B

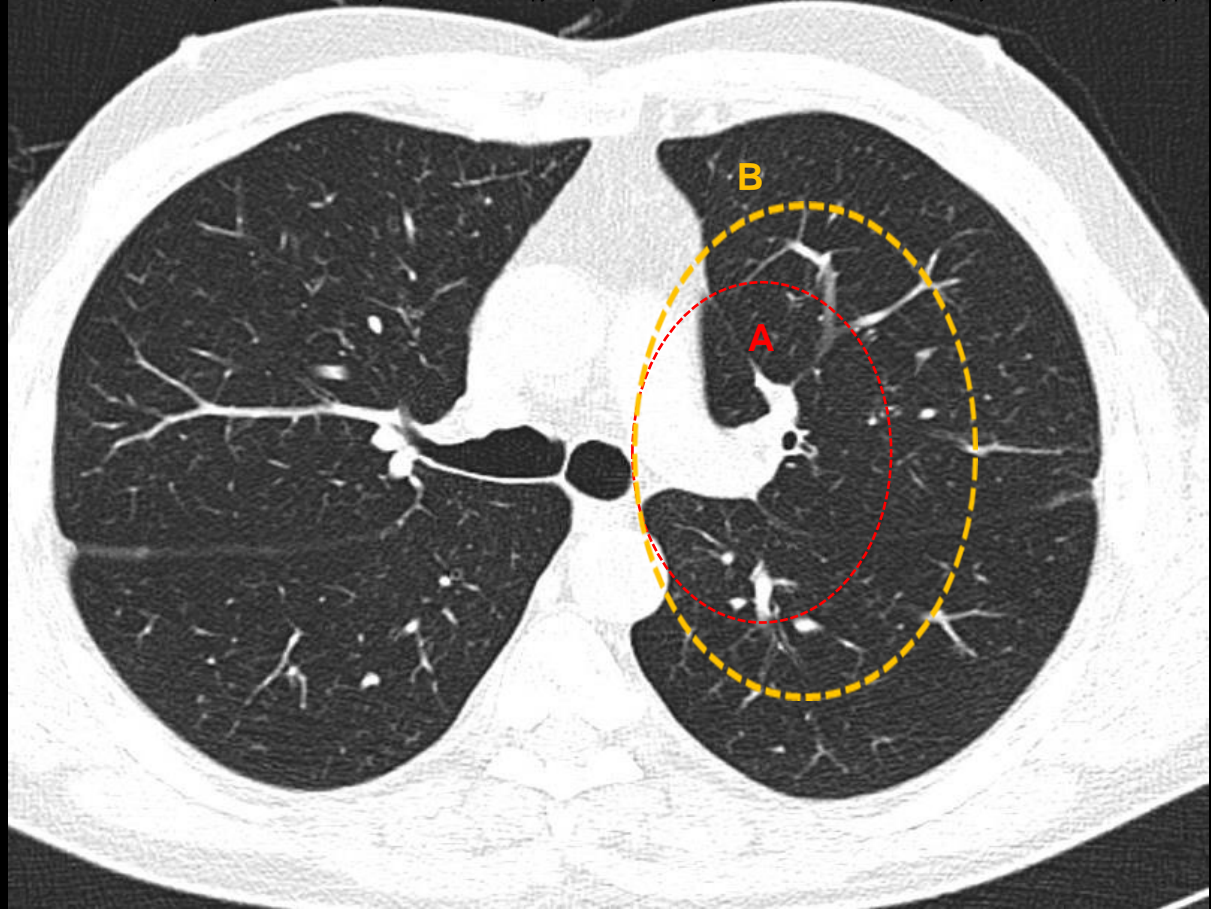

¿Cuál de las dos líneas delimita un tumor central?

- Línea A
- Línea B

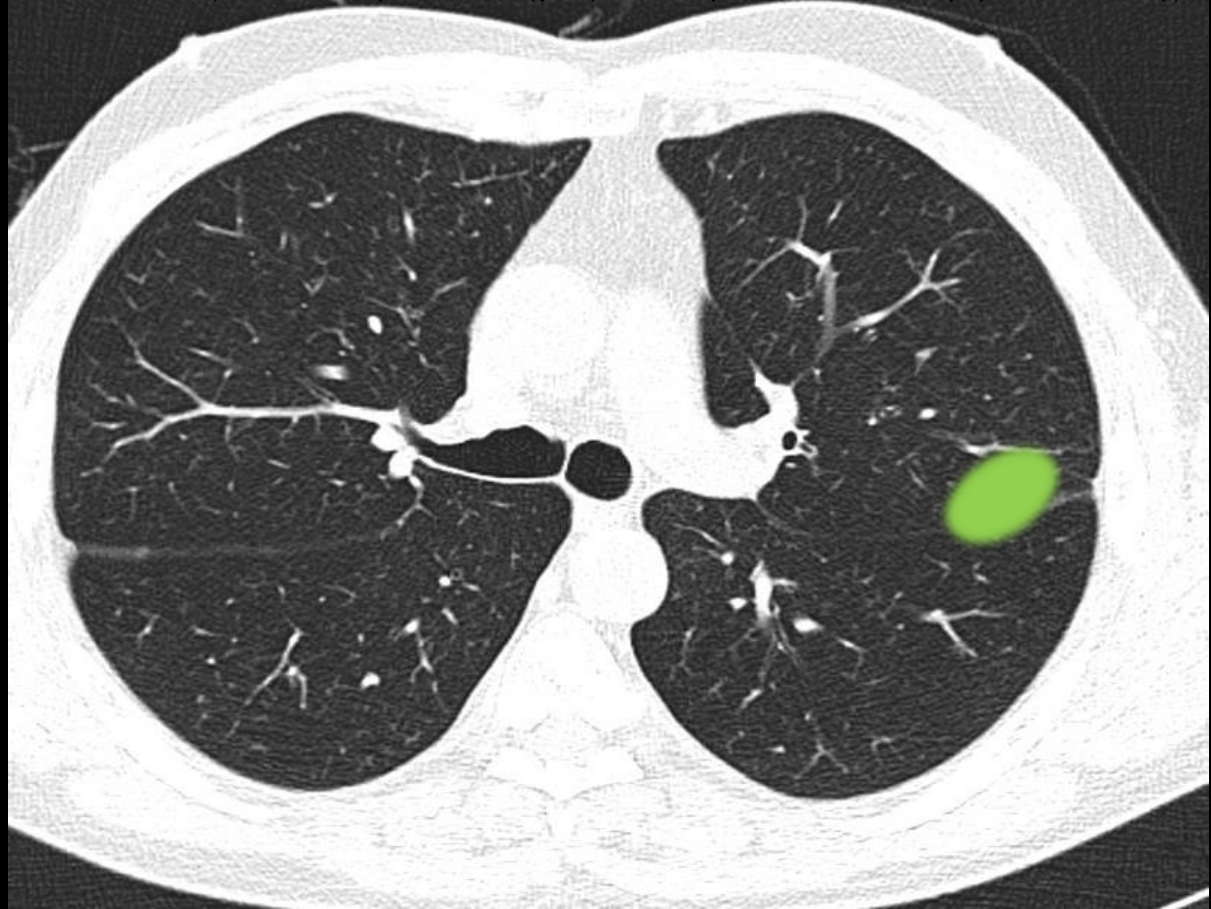

Considerando que la localización en los 2/3 internos del hemitórax corresponden con centralidad, diría que el nódulo (verde) tiene localización:

- Central
- Periférica

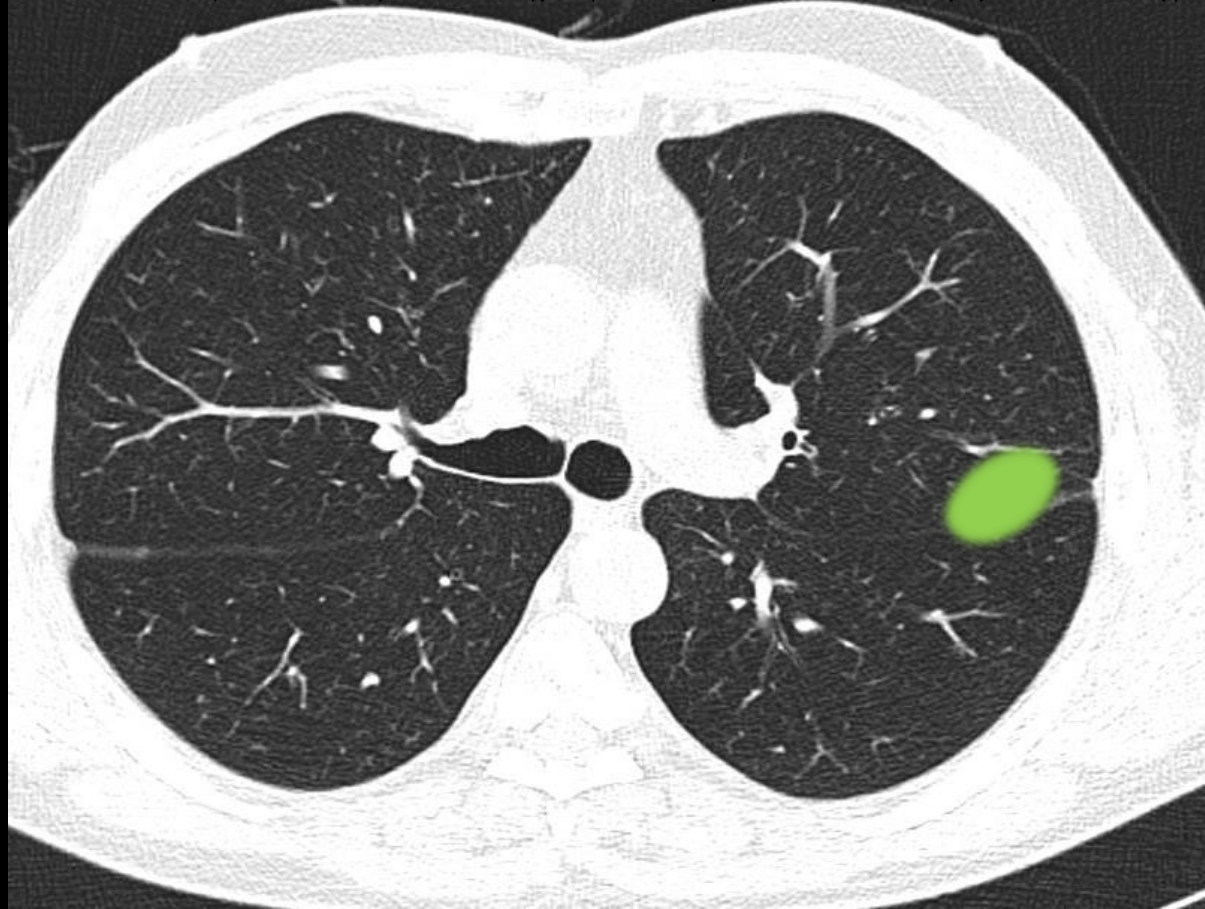

Considerando que la localización en los 2/3 internos del hemitórax corresponden con centralidad, diría que el nódulo (verde), que presenta una lesión endobronquial en la broncoscopia flexible, tiene localización:

- Central
- Periférica

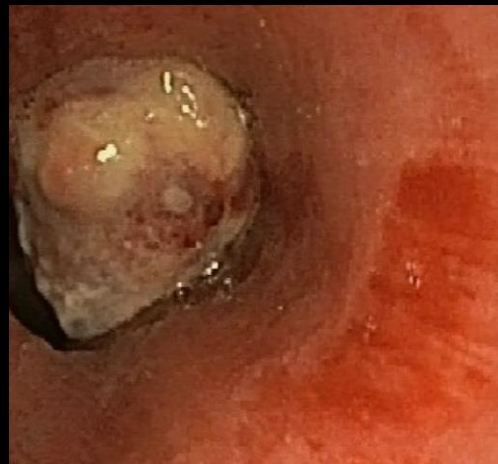

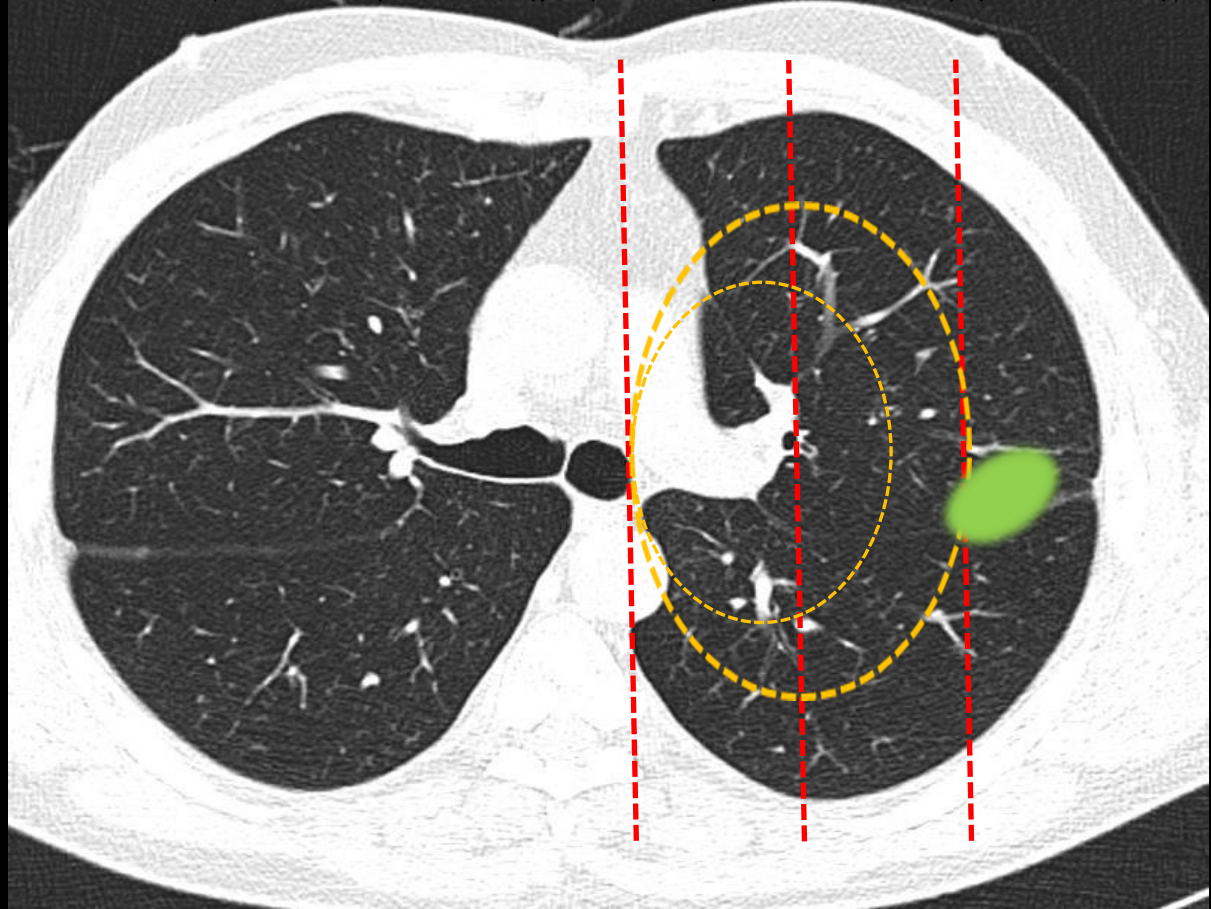

Considerando que la localización en los 2/3 internos del hemitórax corresponden con centralidad, diría que el nódulo (verde) tiene localización:

- Central
- Periférica

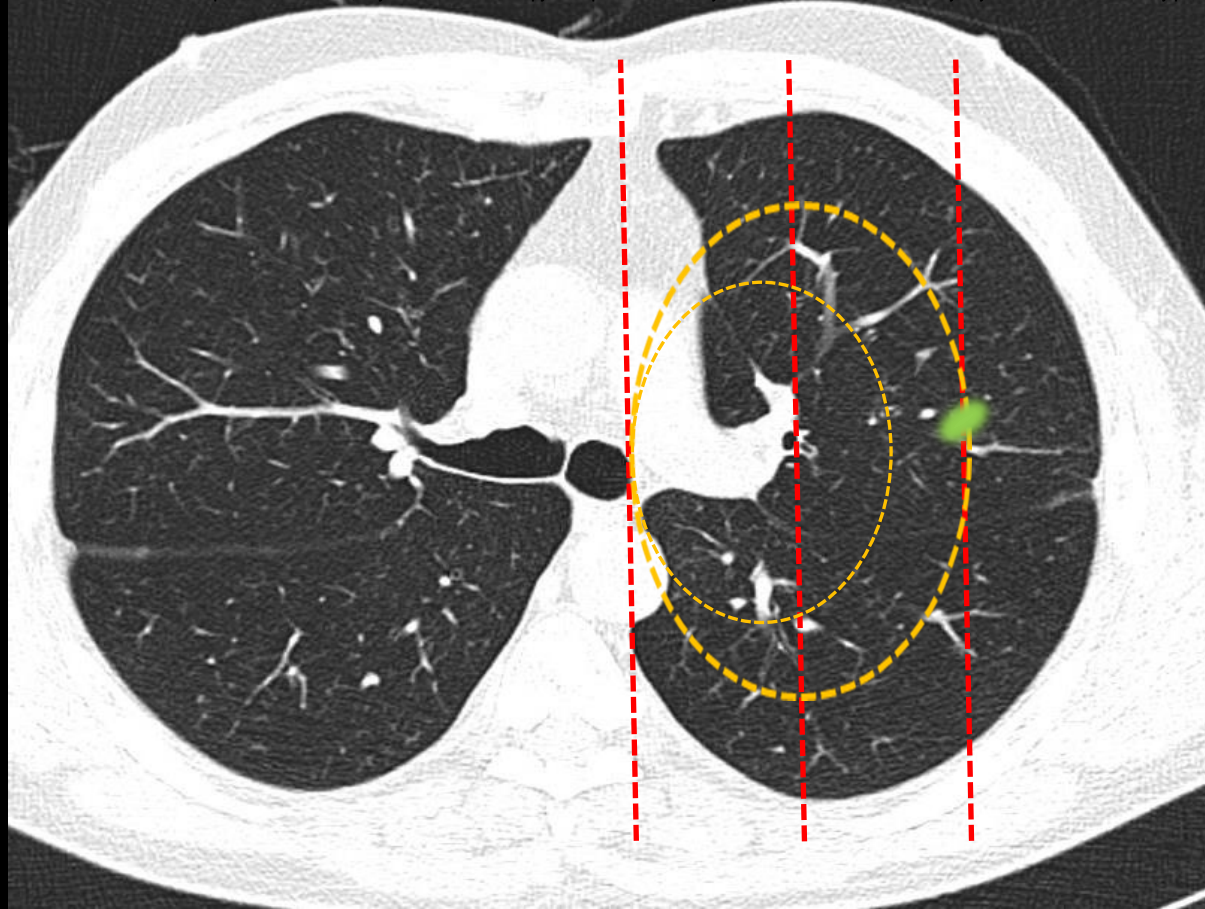

Considerando que la localización en los 2/3 internos del hemitórax corresponden con centralidad, diría que el nódulo (verde) tiene localización:

- Central
- Periférica

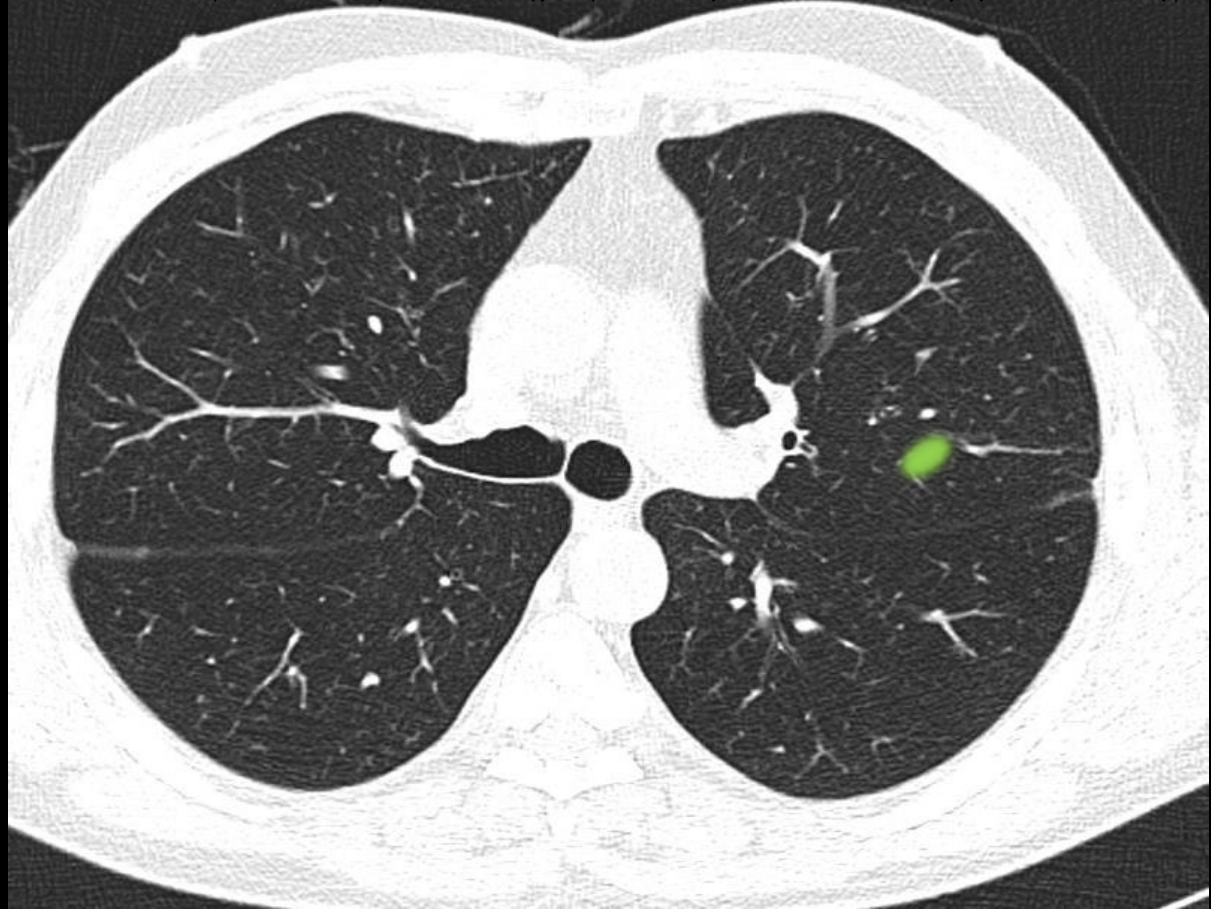

Considerando que la localización en los 2/3 internos del hemitórax corresponden con centralidad, diría que el nódulo (verde) tiene localización:

- Central
- Periférica

¿Qué definición utiliza usted para clasificar una lesión como central?

1. Lesiones en contacto con las estructuras hiliares (bronquios lobares, arterias pulmonares principales o lobares, venas pulmonares principales)
2. Lesiones localizadas en el tercio central del hemitórax
3. Lesiones localizadas en los 2/3 centrales del hemitórax
4. Lesiones en contacto con el mediastino
5. Lesiones endobronquiales en la broncoscopia flexible
6. Otra

¿Es usted?

1. Neumólogo
2. Cirujano torácico
3. Radiólogo
4. Oncólogo
5. Otra

¿Participa usted activamente en el diagnóstico, estadificación y/o tratamiento del cáncer de pulmón?

1. Si
2. No

¿Es usted?

1. Hombre
2. Mujer

¿Edad?

1. 25-30
2. 30-45
3. 45-55
4. 55-65
5. >65

GRACIAS!
